# Supplementary figures and images for: Stable isotope and modelling evidence for CO 2 as a driver of glacial–interglacial vegetation shifts in southern Africa
Source: Copernicus journal article supplement (doi:10.5194/bg-10-2001-2013), 2013-03-22

Modern

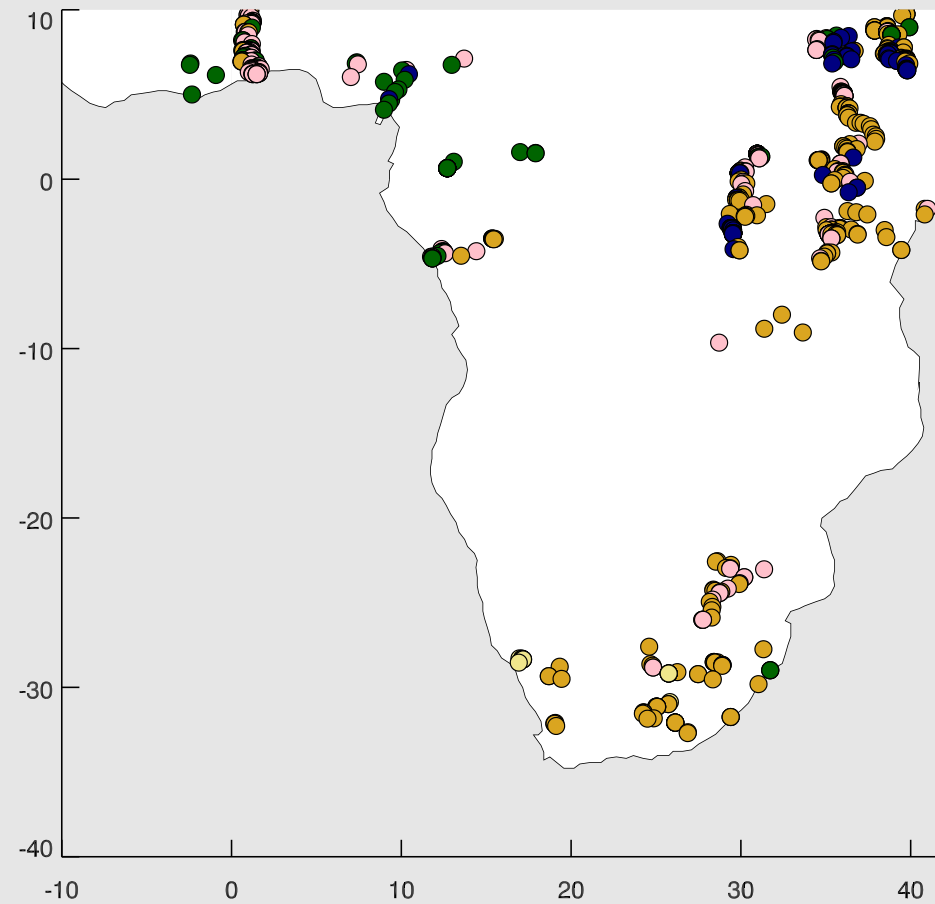

MH

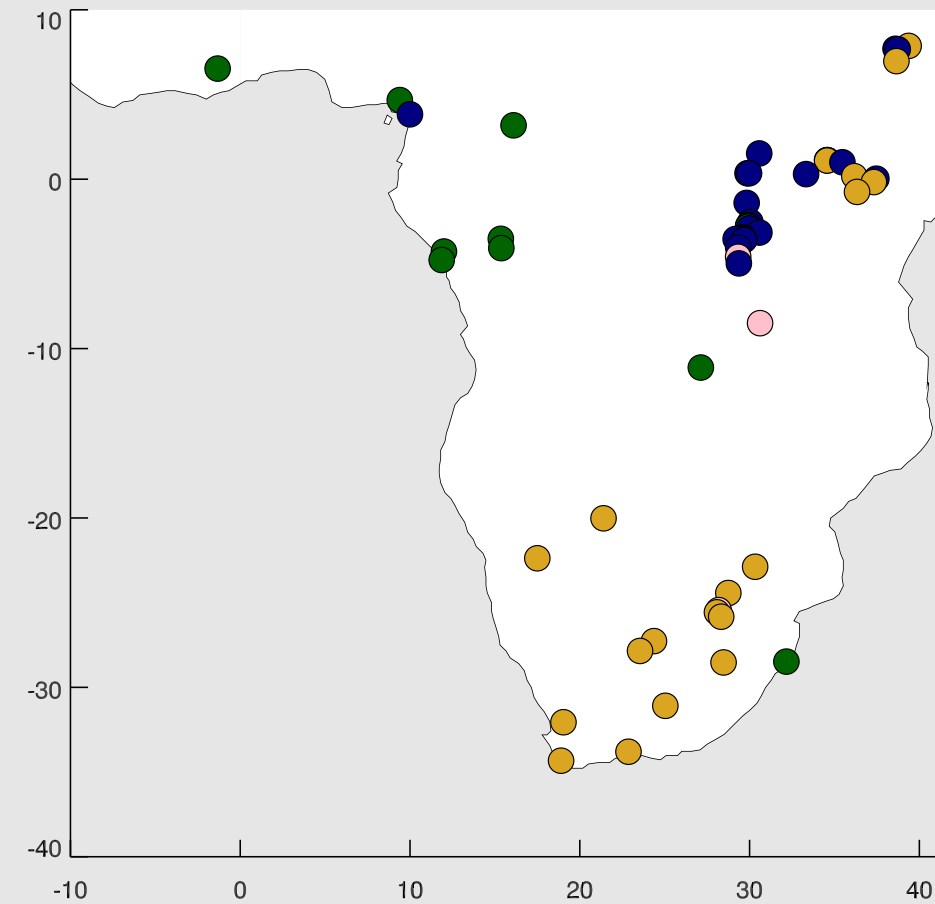

LGM

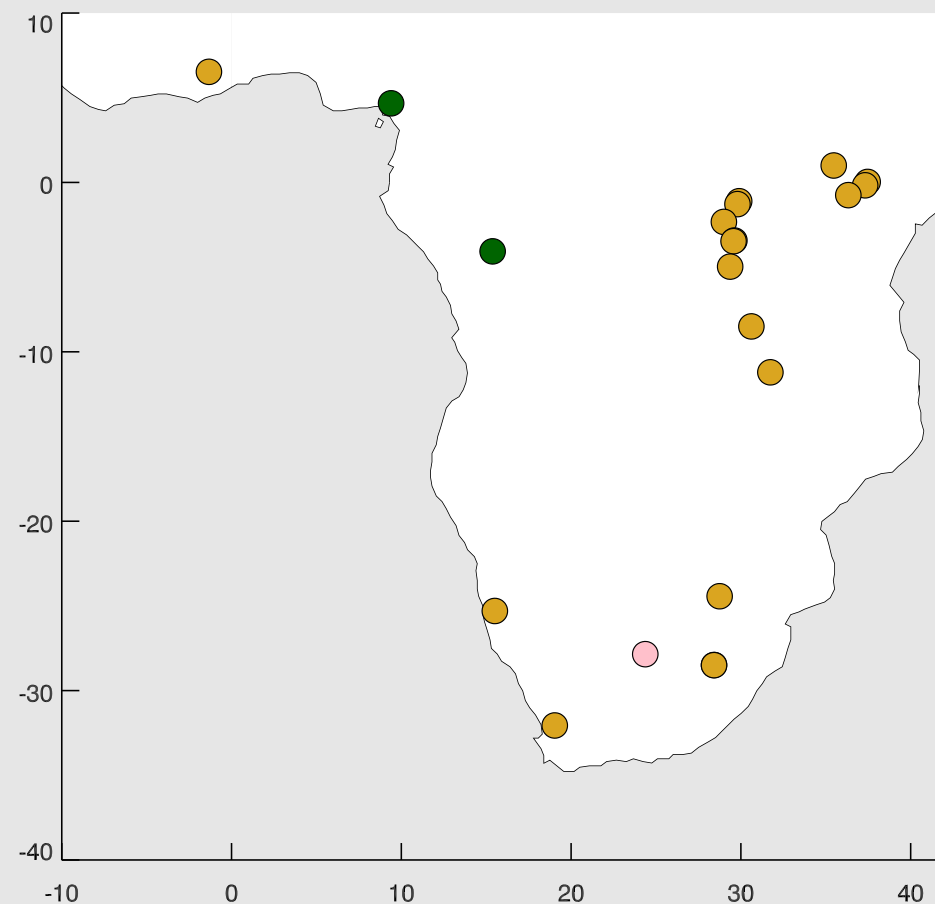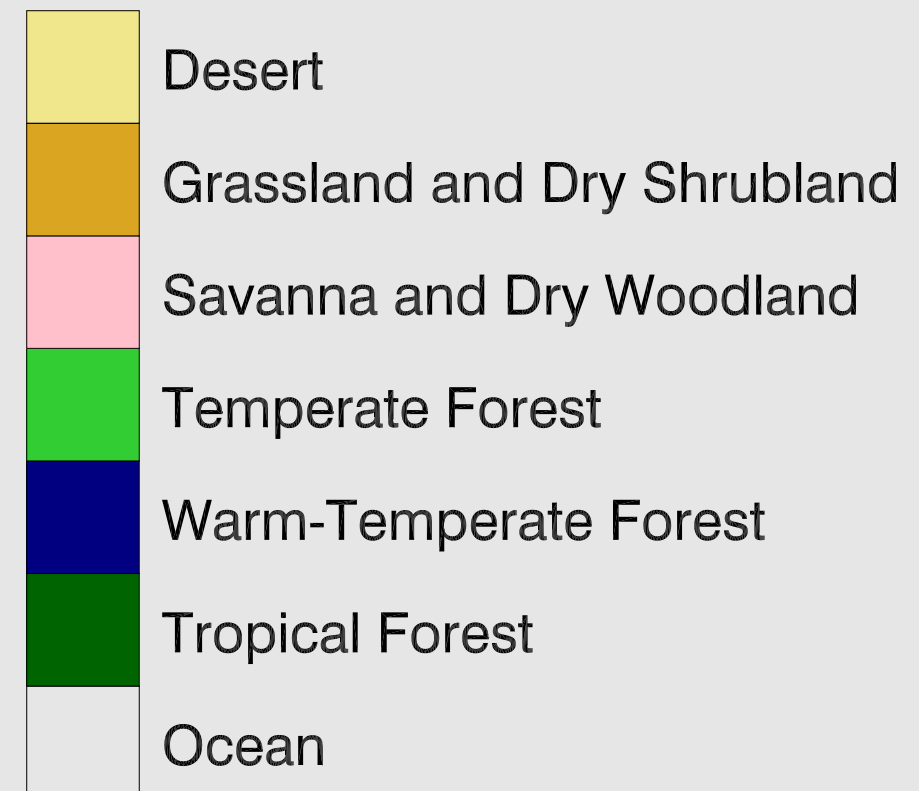

Supplement: Supplementary file 1 [file bg-10-2001-2013-supplement.zip]

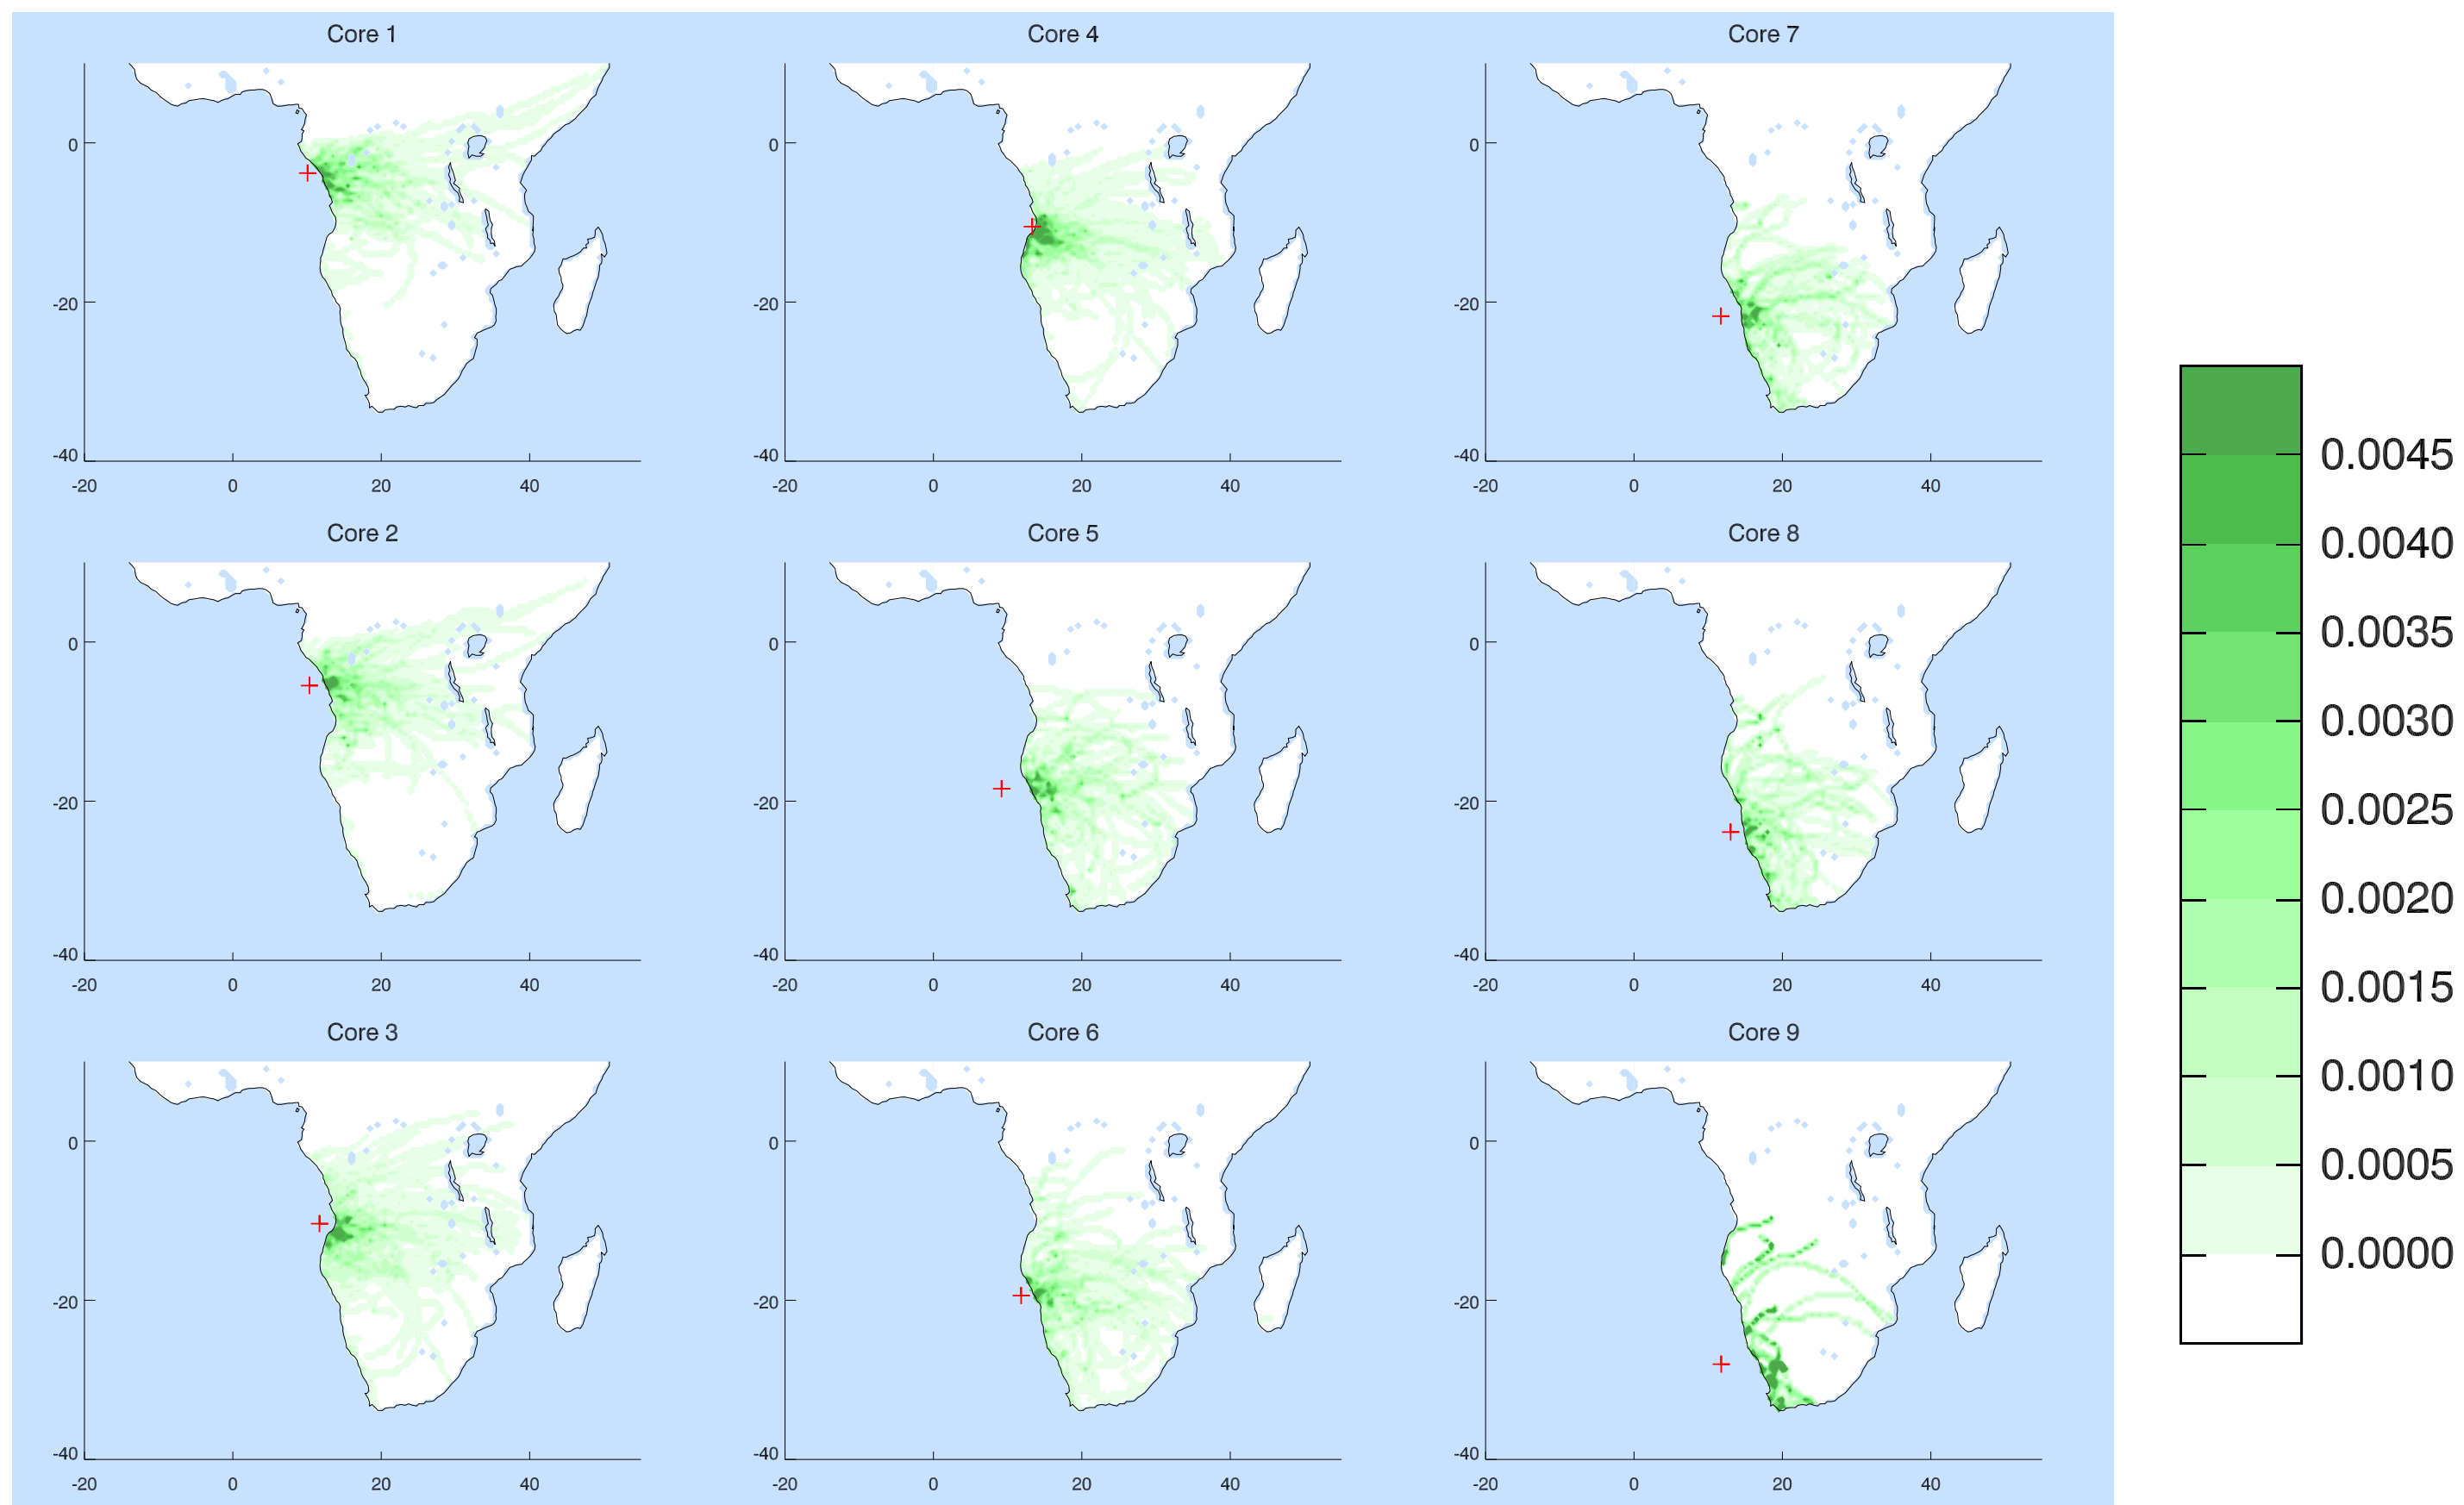

Supplement: Supplementary file 2 [file bg-10-2001-2013-supplement.zip]
